# Supplementary material
Source: publisher figshare collection journal article supplement (https://acs.figshare.com/ndownloader/files/4489198)
Supplement: Supplementary file 1 [file 4489198]

## **Supporting Information: File 1 of 2**

### **Structural and Energetic Determinants of Thermal Stability, and Hierarchical Unfolding Pathways of Hyperthermophilic Proteins, Sac7d and Sso7d**

U. Deva Priyakumar,\* S. Ramakrishna, K. R. Nagarjuna and S. Karunakar Reddy

*Center for Computational Natural Sciences and Bioinformatics, International Institute of Information Technology, Hyderabad 500 032, India*

\*Corresponding Author

Email: [deva@iiit.ac.in](mailto:deva@iiit.ac.in)

Phone: +91-40-6653 1161

FAX: +91-40-6653 1413

### Sac7d - 300K

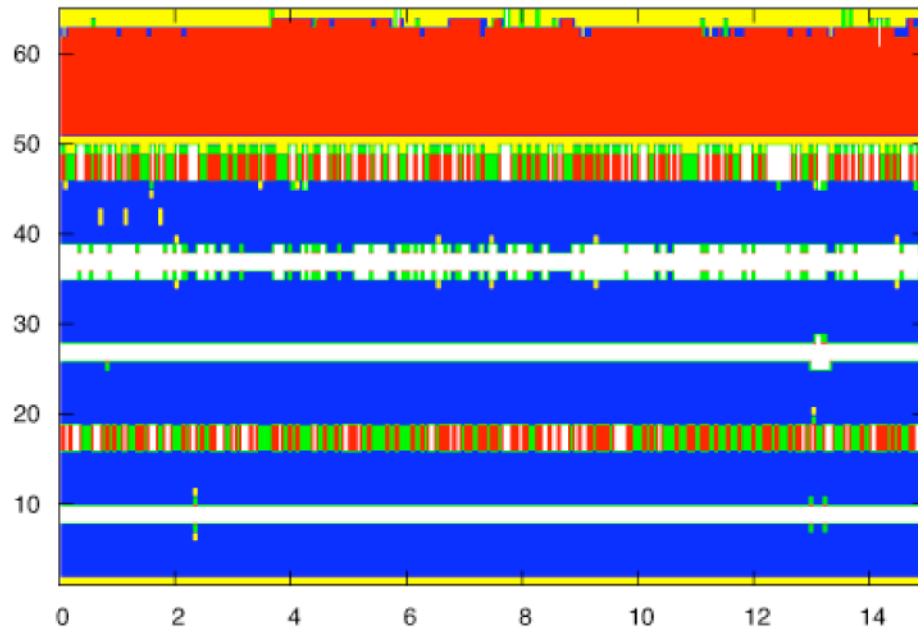

### Sac7d - 360K

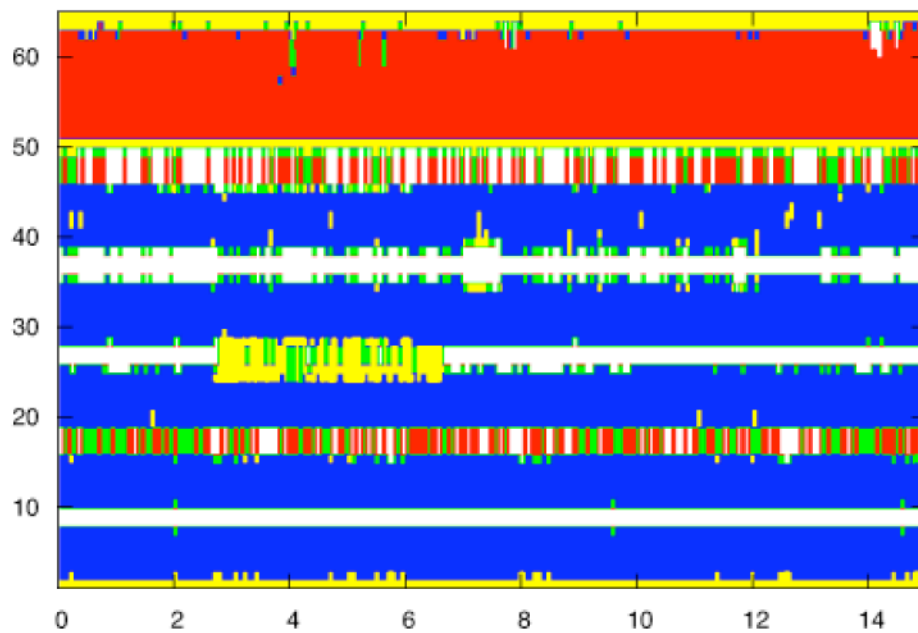

**Figure S1:** The evolution of the secondary structure of Sac7d with respect to time obtained at 300 and 360 K.  $\beta$ -sheets,  $\alpha$ -helices, coils, turns, 3-10 helices are given in blue, red, yellow, white, and green respectively.

## Sso7d - 300 K

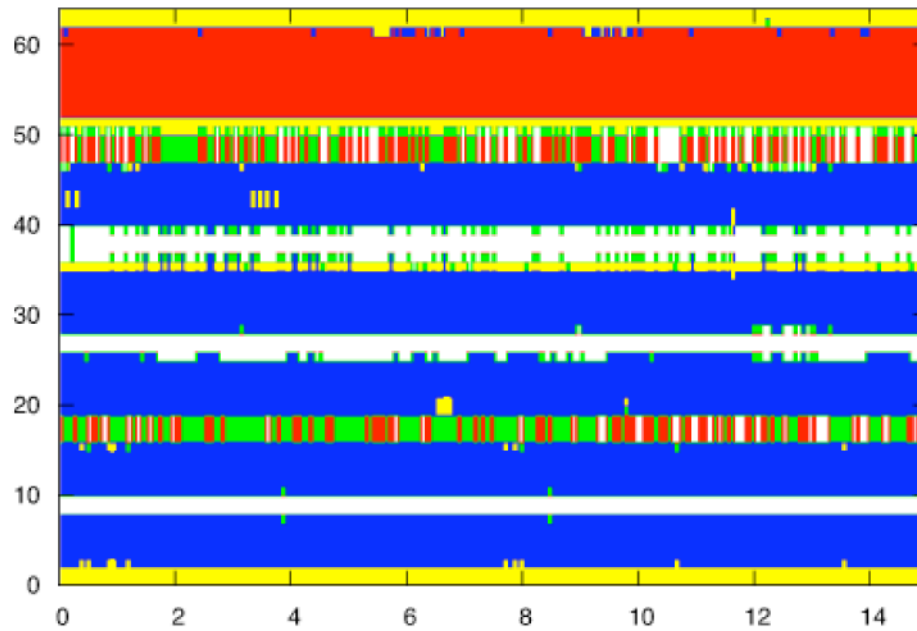

## Sso7d - 360 K

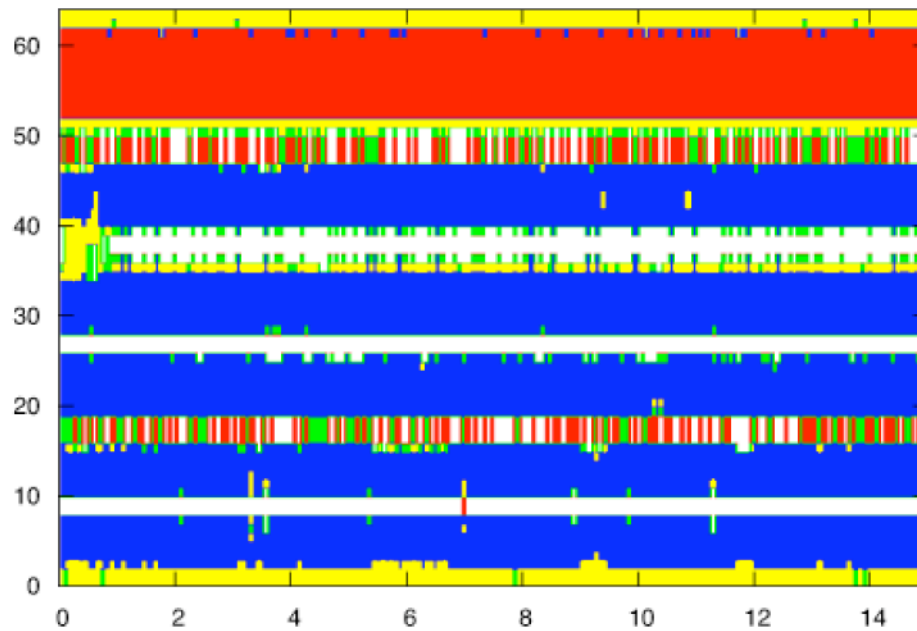

**Figure S2:** The evolution of the secondary structure of Sso7d with respect to time obtained at 300 and 360 K.  $\beta$ -sheets,  $\alpha$ -helices, coils, turns, 3-10 helices are given in blue, red, yellow, white, and green respectively.

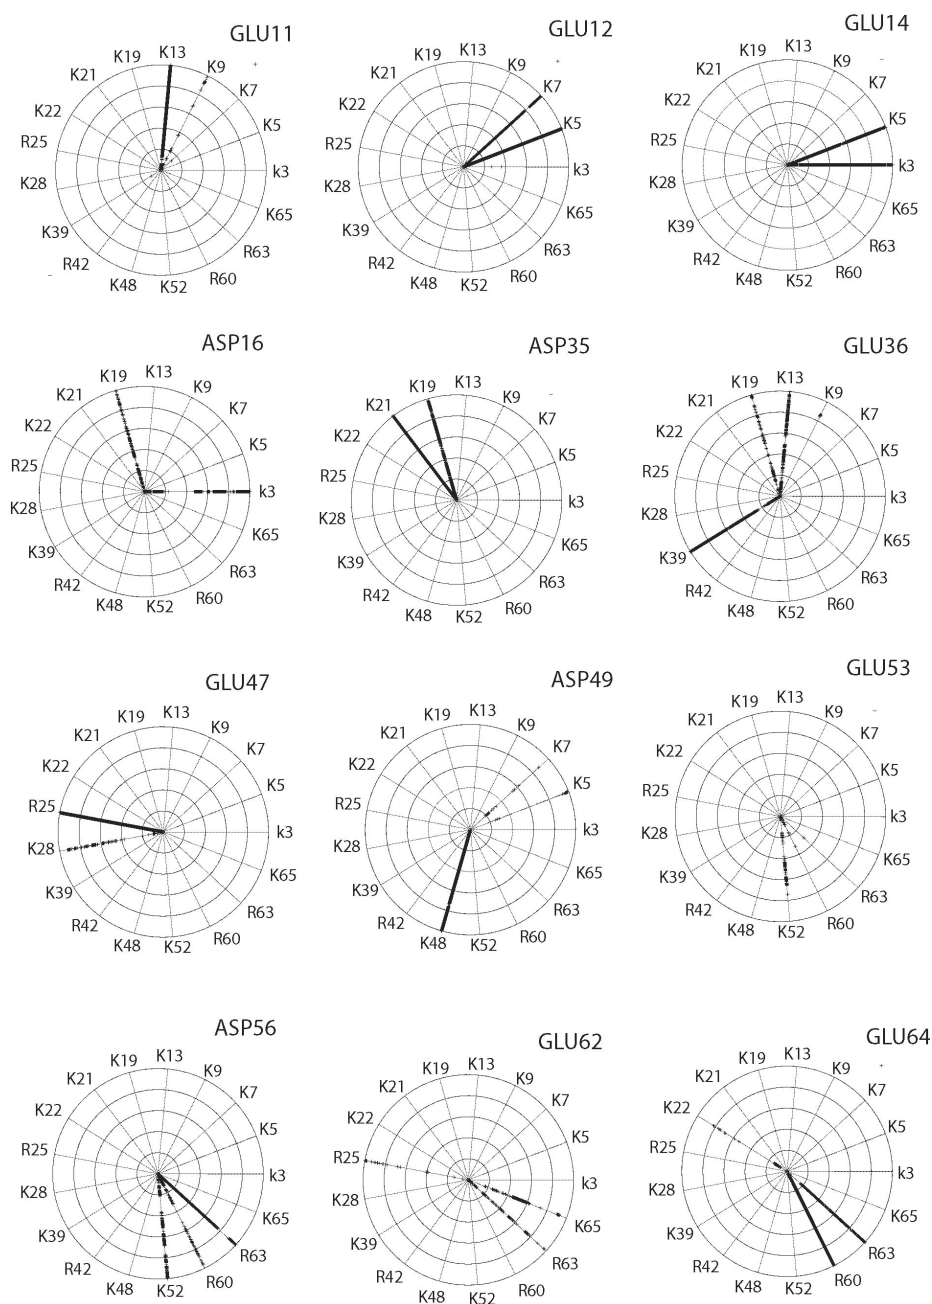

**Figure S3:** Plots showing the salt bridge networks of Sac7d at 300 K. In each of the circular plots, the center represents  $t = 0$ , and the outermost circle represents  $t = 15$  ns. Each plot gives information on the existence/nonexistence of salt bridge interaction between each of the negative residue and all other positive residues present in the protein. Presence of a data point along the spokes indicates salt bridging interaction (less than 6 Å) between the corresponding positive and negative residue pairs.

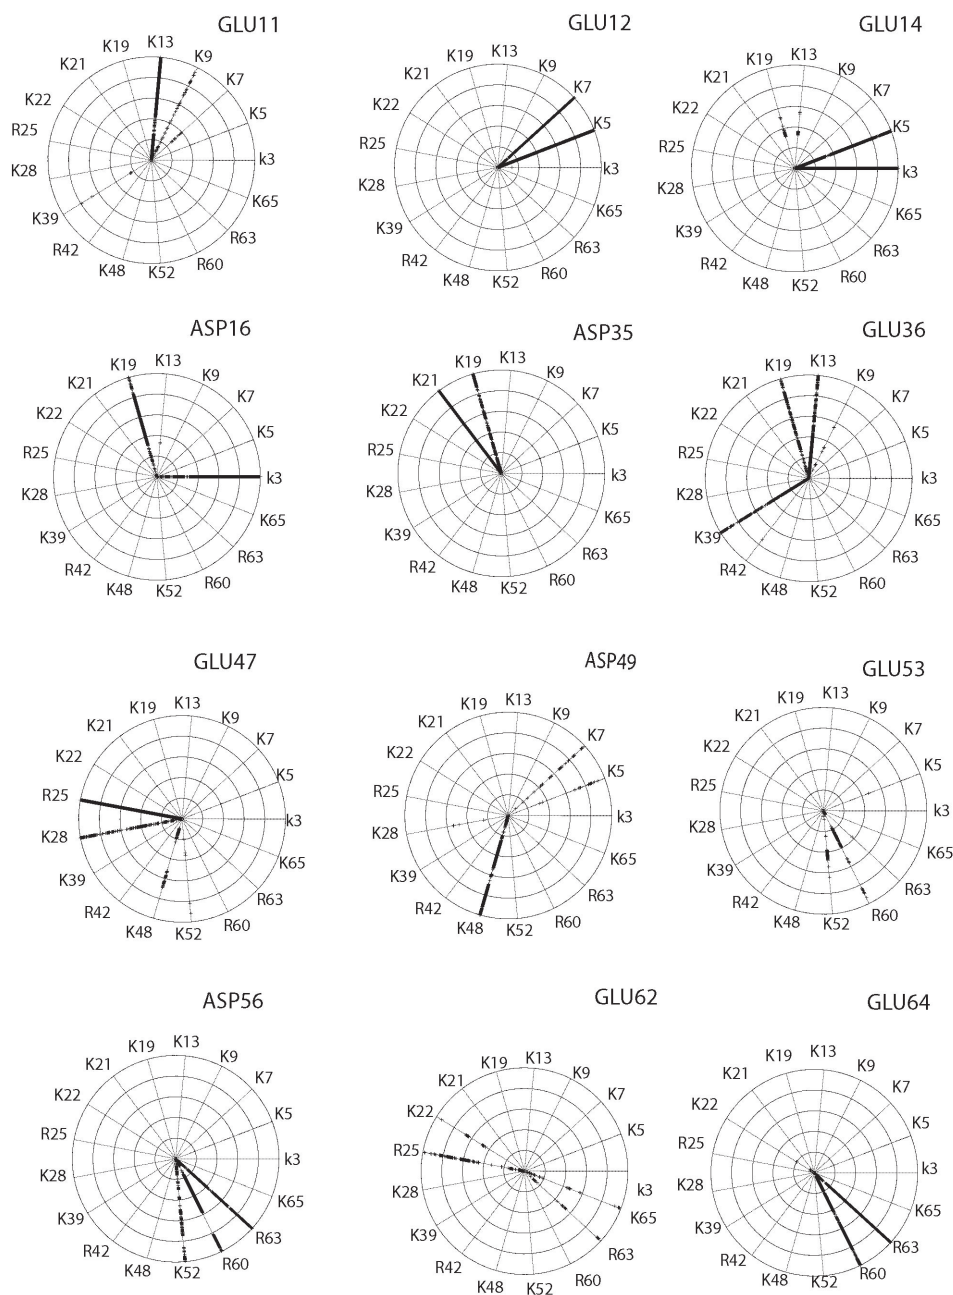

**Figure S4:** Plots showing the salt bridge networks of Sac7d at 360 K. In each of the circular plots, the center represents  $t = 0$ , and the outermost circle represents  $t = 15$  ns. Each plot gives information on the existence/nonexistence of salt bridge interaction between each of the negative residue and all other positive residues present in the protein. Presence of a data point along the spokes indicates salt bridging interaction (less than 6 Å) between the corresponding positive and negative residue pairs.

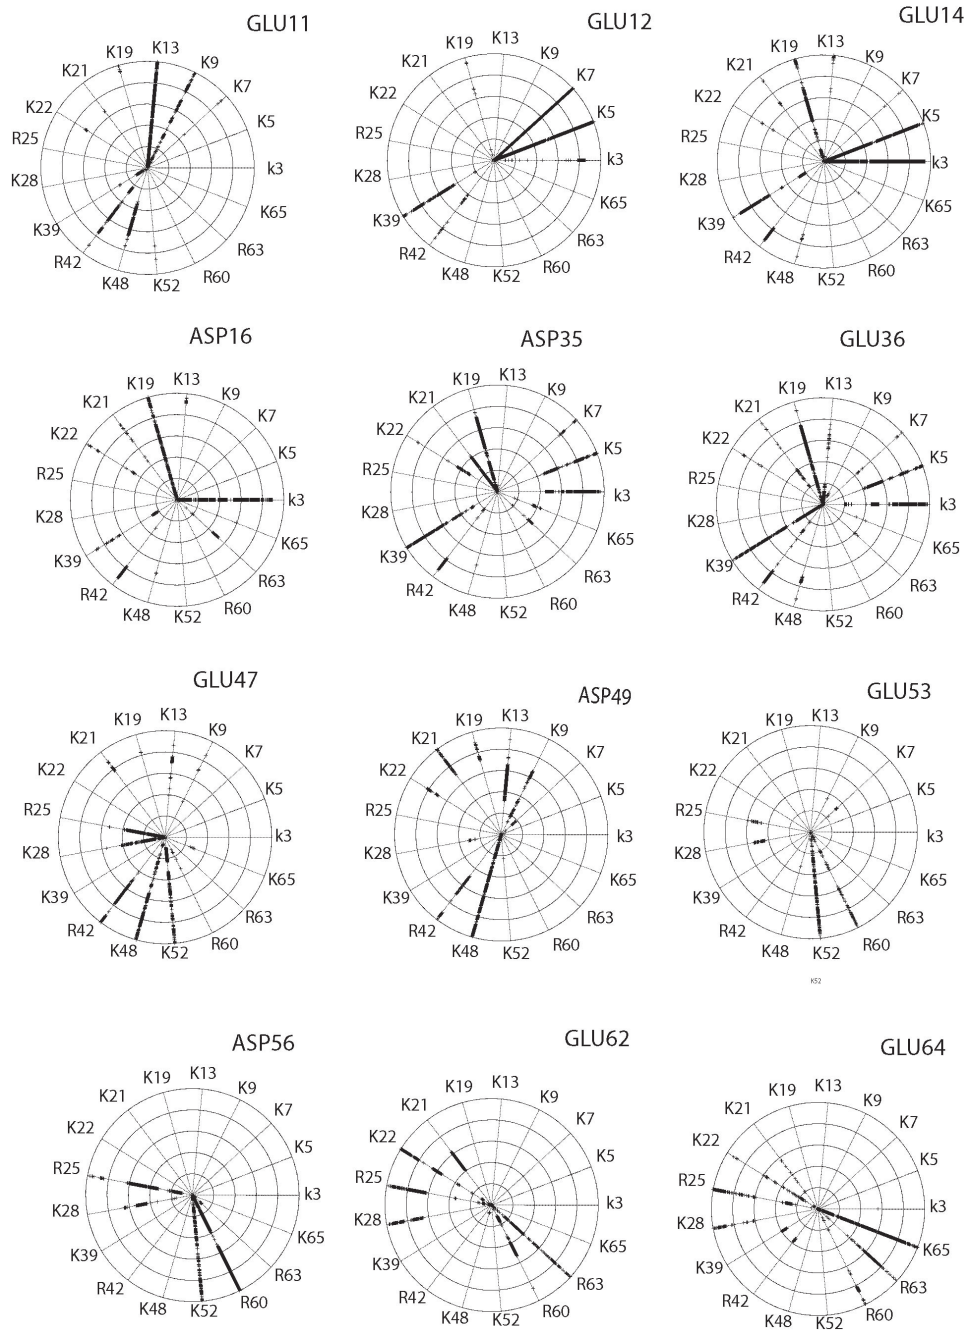

**Figure S5:** Plots showing the salt bridge networks of Sac7d at 500 K. In each of the circular plots, the center represents  $t = 0$ , and the outermost circle represents  $t = 15$  ns. Each plot gives information on the existence/nonexistence of salt bridge interaction between each of the negative residue and all other positive residues present in the protein. Presence of a data point along the spokes indicates salt bridging interaction (less than 6 Å) between the corresponding positive and negative residue pairs.

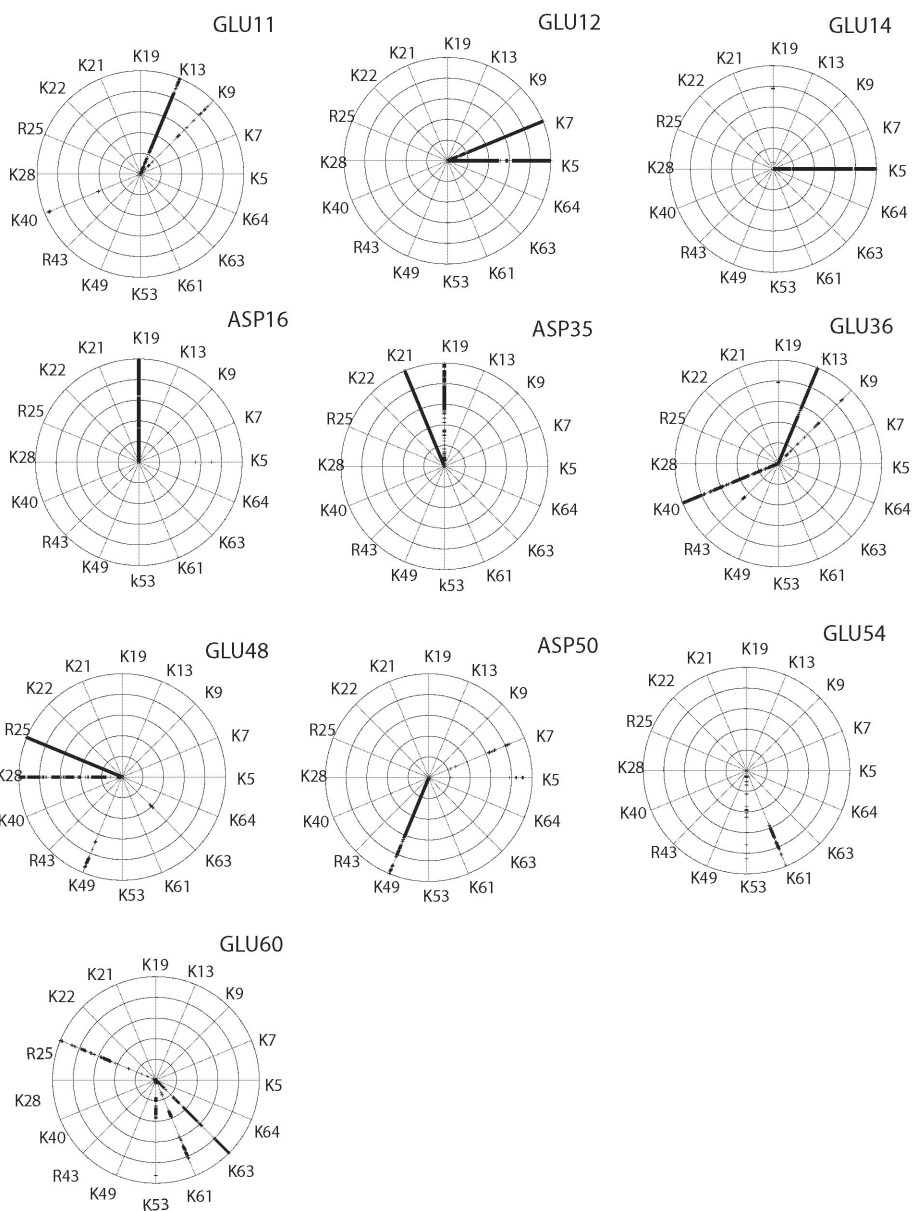

**Figure S6:** Plots showing the salt bridge networks of Sso7d at 300 K. In each of the circular plots, the center represents  $t = 0$ , and the outermost circle represents  $t = 15$  ns. Each plot gives information on the existence/nonexistence of salt bridge interaction between each of the negative residue and all other positive residues present in the protein. Presence of a data point along the spokes indicates salt bridging interaction (less than 6 Å) between the corresponding positive and negative residue pairs.



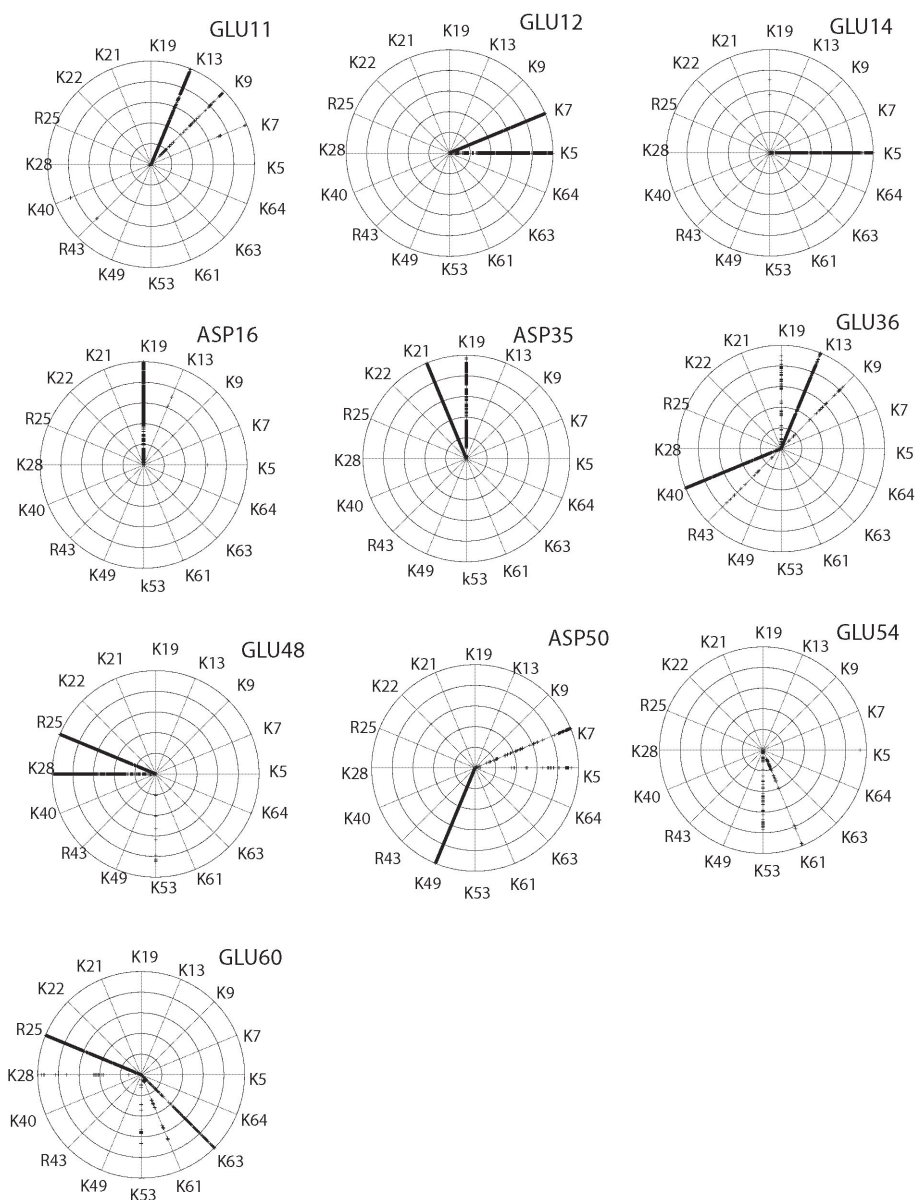

**Figure S7:** Plots showing the salt bridge networks of Sso7d at 360 K. In each of the circular plots, the center represents  $t = 0$ , and the outermost circle represents  $t = 15$  ns. Each plot gives information on the existence/nonexistence of salt bridge interaction between each of the negative residue and all other positive residues present in the protein. Presence of a data point along the spokes indicates salt bridging interaction (less than 6 Å) between the corresponding positive and negative residue pairs.



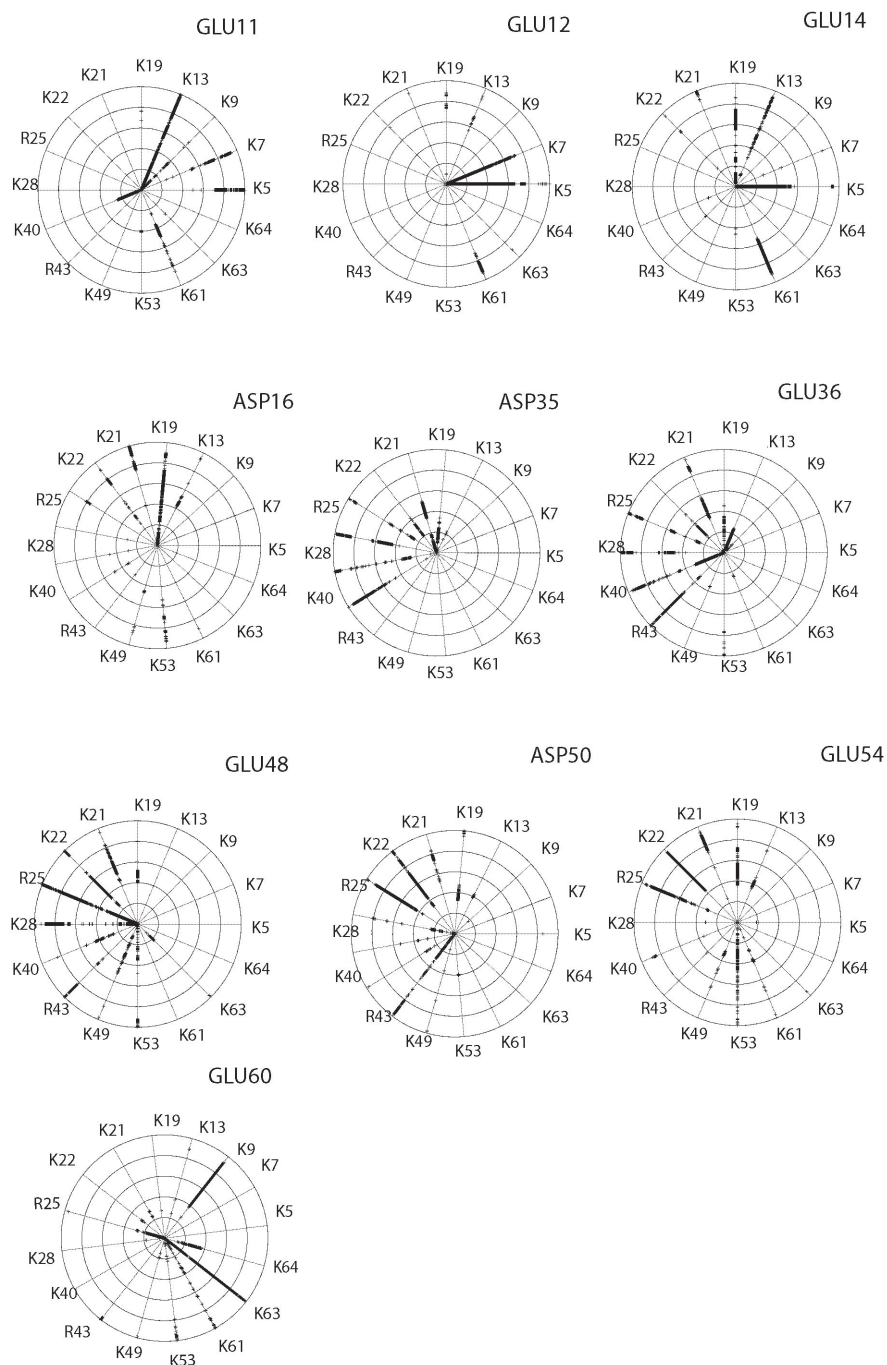

**Figure S8:** Plots showing the salt bridge networks of Sso7d at 500 K. In each of the circular plots, the center represents  $t = 0$ , and the outermost circle represents  $t = 15$  ns. Each plot gives information on the existence/nonexistence of salt bridge interaction between each of the negative residue and all other positive residues present in the protein. Presence of a data point along the spokes indicates salt bridging interaction (less than 6 Å) between the corresponding positive and negative residue pairs.
